# Supplementary material
Source: Royal Society of Chemistry journal article supplement (doi:10.1039/d5nr04850h)
Supplement: d5nr04850h1.pdf [file d5nr04850h1.pdf]

## Supplementary Figures

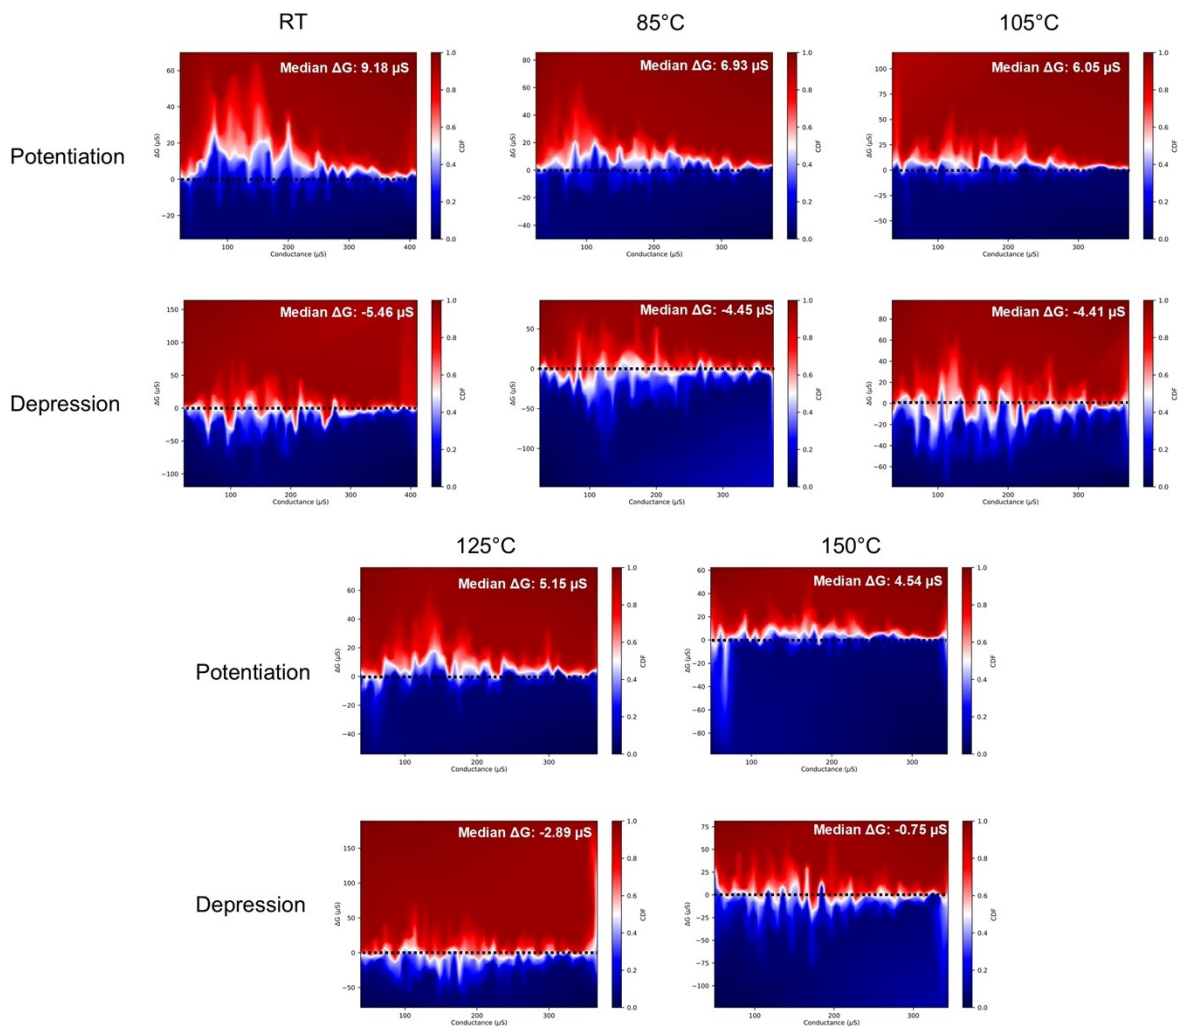

**Fig. S1** Raw  $\Delta G$ - $G$  distributions for potentiation and depression from RT to 150 °C, showing progressive conductance dynamic range compression at elevated temperatures.

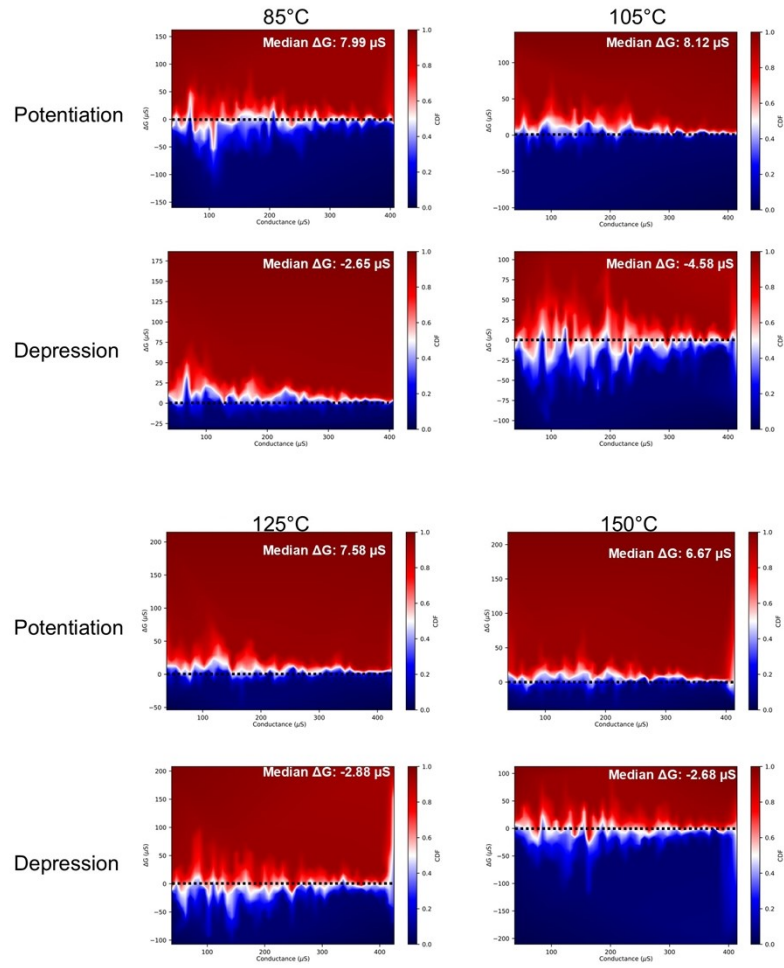

**Fig. S2** Compensated  $\Delta G$ -G distributions after applying the proposed temperature-aware scheme, demonstrating restoration of the effective conductance dynamic range.

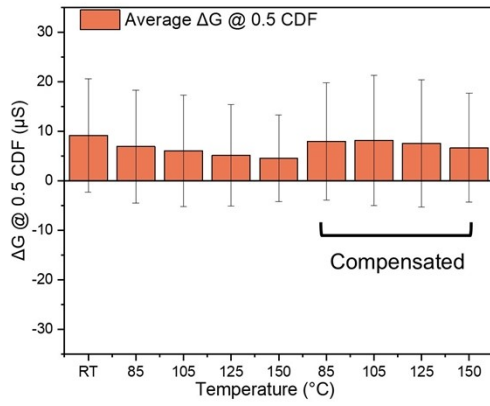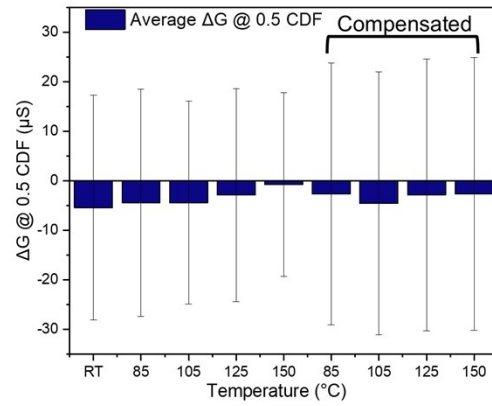

**Fig. S3** Average  $\Delta G$  at 0.5 CDF and corresponding standard deviation versus temperature, highlighting reduced update magnitude and increased relative variability under dynamic range compression.
